# Supplementary material for: Cnf1 Variants Endowed with the Ability to Cross the Blood–Brain Barrier: A New Potential Therapeutic Strategy for Glioblastoma
Source: MDPI journal article supplement (doi:10.3390/toxins12050291), 2020-05-04
Supplement: s1 [file s1]

# Supplementary Materials: Cnf1 Variants Endowed with the Ability to Cross the Blood-Brain Barrier: A New Potential Therapeutic Strategy for Glioblastoma

Andrea Colarusso, Zaira Maroccia, Ermenegilda Parrilli, Elena Angela Pia Germinario, Andrea Fortuna, Stefano Loizzo, Laura Ricceri, Maria Luisa Tutino, Carla Fiorentini and Alessia Fabbri

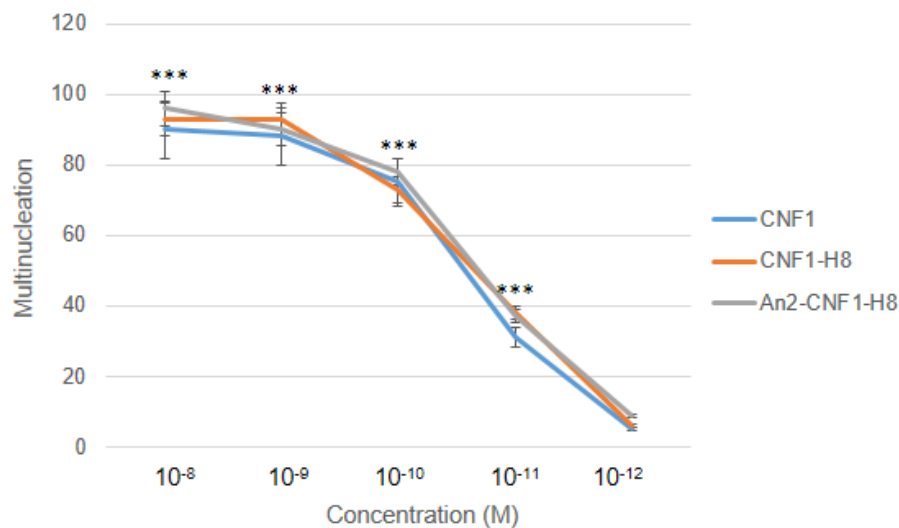

**Figure S1.** Hep-2 multinucleation. Graph showing the multinucleating effect on Hep-2 cells of decreasing doses of the different variants. \*\*\*  $p < 0.001$ .

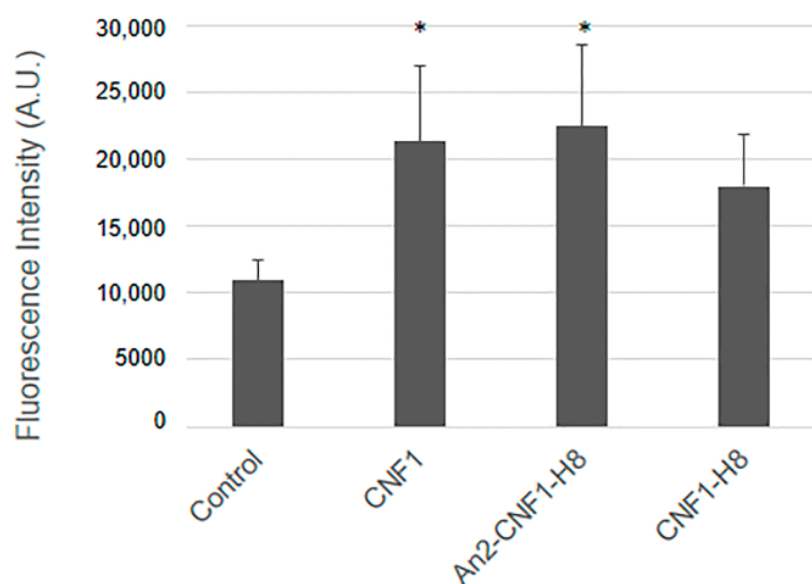

**Figure S2.** Fluorescence intensity. Graph showing the Fluorescence Intensity of F-actin staining on HBEC-5i cells. \*\*\*  $p < 0.05$ .

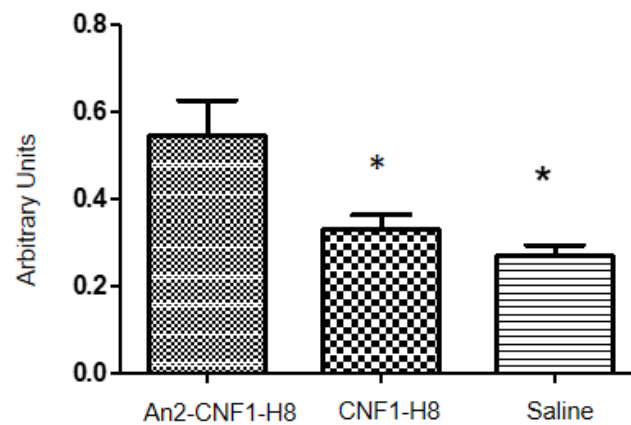

**Figure S3.** Spinophilin expression in hippocampal tissue. Graph showing Spinophilin protein expressions in hippocampal tissue (An2-CNF1-H8,  $n = 6$ ; CNF1-H8,  $n = 4$ ; Saline,  $n = 4$ ). The amounts of the above proteins are normalized as a function of  $\alpha$ -tubulin. Note that An2-CNF1-H8 is able to increase spinophilin in hippocampus once intravenously inoculated. Values are expressed as mean  $\pm$  SEM. \*  $p < 0.05$  for An2-CNF1-H8 vs other groups.
